# Supplementary material
Source: PubMed Central journal article supplement (PMC9228201)
Supplement: NIHMS1810109-supplement-Supporting_Information.pdf [file NIHMS1810109-supplement-Supporting_Information.pdf]

# **Size-and-Shape Space Gaussian Mixture Models for Structural Clustering of Molecular Dynamics Trajectories.**

## **Supporting Information.**

Heidi Klem,<sup>†</sup> Glen M. Hocky,<sup>‡</sup> and Martin McCullagh<sup>\*,¶</sup>

<sup>†</sup>*Department of Chemistry, Colorado State University, Fort Collins, CO 80523*

<sup>‡</sup>*Department of Chemistry, New York University, New York, NY 10003*

<sup>¶</sup>*Department of Chemistry, Oklahoma State University, Stillwater, OK 74078*

E-mail: martin.mccullagh@okstate.edu

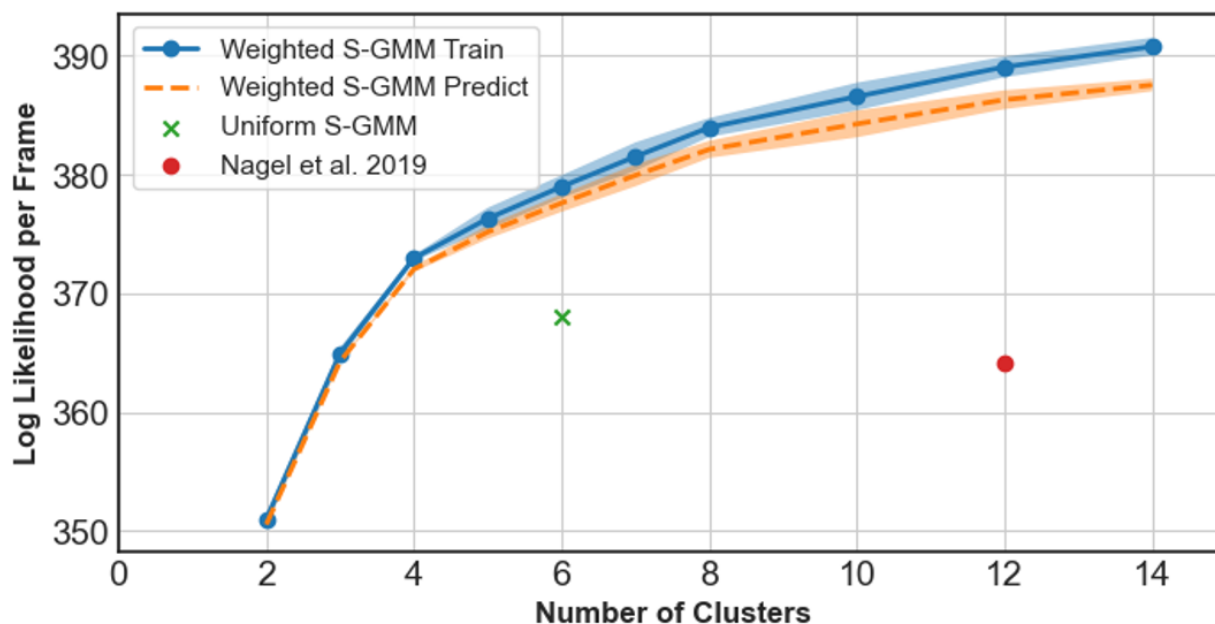

Figure S1: Log likelihood of weighted shape-GMM (S-GMM) as a function of number of clusters for HP35 trained on  $\sim 25K$  frames (blue line) in a 10-fold cross validation (orange dashed) scheme. The shaded region indicates the 90% confidence interval. The features are C, CA and N backbone atoms of residues 2-34, the C atom of residue 1 and N atom of residue 35 (101 atoms total). The log likelihood value from a uniform 6-state shape-GMM is shown as a green x marker. The red circle marker indicates the log likelihood that results from the HP35 discretization of Nagel *et al.* clustering procedure resulting in 12-states.<sup>2</sup>

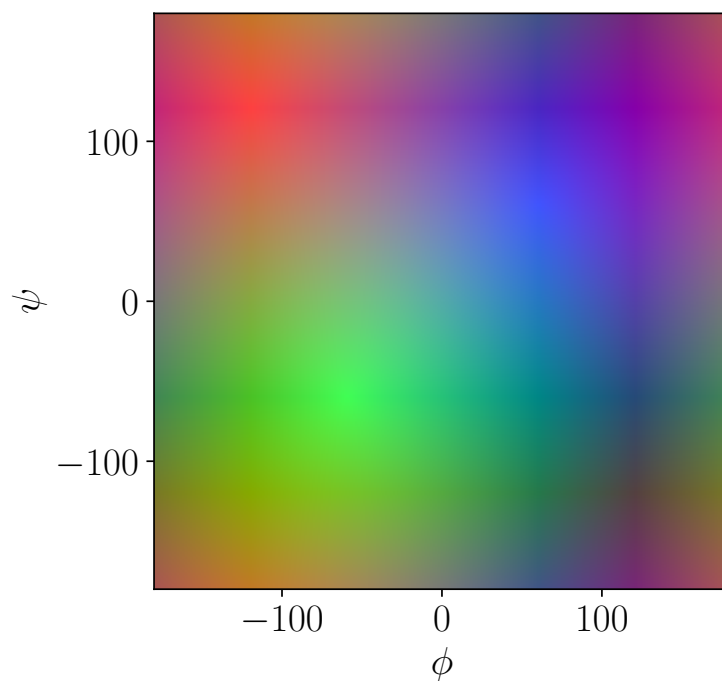

Figure S2: RGB values corresponding to phi-psi angle pairs used to assignment a unique color value to a dihedral conformation. The major dihedral states are indicated with more vibrant colors: red, green, and blue correspond respectively to  $\beta$ -strand,  $\alpha_R$ -helical, and  $\alpha_L$ -helical dihedral character. The code used to produce this mapping can be found at <https://github.com/moldyn/ramacolor>.<sup>2,3</sup>

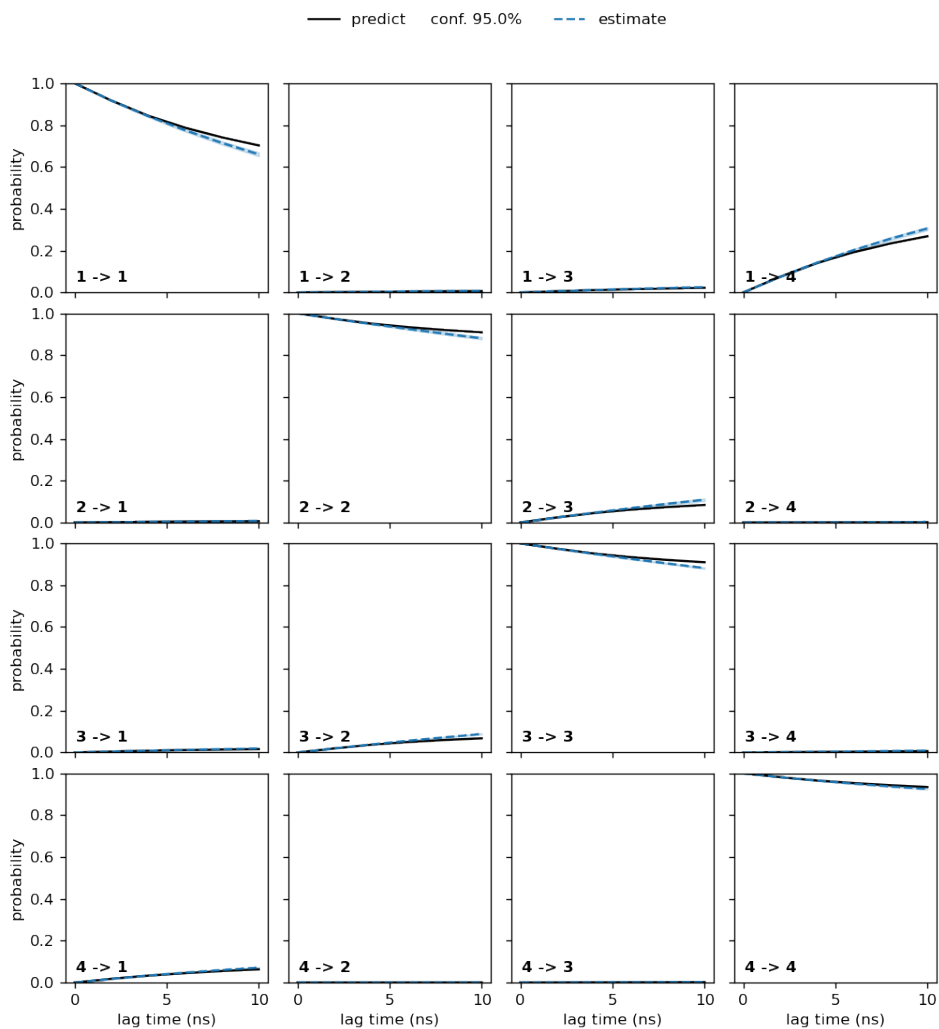

Figure S3: Chapman-Kolmogorov test for 4-state MSM resulting from weighted shape-GMM clustering on HP35. Computed using PyEMMA software.<sup>1</sup>

Table S1: Scores for a variety of clusterings of the HP35 trajectory. VAMP-2 scores were computed after construction of MSMs using a 10-fold cross validation on five trajectory segments using PyEMMA.<sup>1</sup> These were computed using either the first four ( $k = 4$ ) or the first 10 ( $k = 10$ ) eigenvalues of the transition matrix. Log likelihoods of a weighted shape-GMM (wSGMM) model were also computed on 10 randomly selected trajectory segments. A dynamic coring (here denoted dCore) procedure was applied to each clustering.<sup>2</sup> Error as estimated by 10-fold trajectory chunking are reported in parentheses.

| Clustering Model                                   | VAMP-2 Score<br>(k=4) | VAMP-2 Score<br>(k=10) | wSGMM Log Likelihood per Frame |
|----------------------------------------------------|-----------------------|------------------------|--------------------------------|
| wSGMM 4-state                                      | 3.3(2)                |                        | 372.4(1)                       |
| wSGMM 4-state (dCore)                              | 3.87(3)               |                        | 372.0(1)                       |
| wSGMM 6-state                                      | 3.4(1)                |                        | 379.5(1)                       |
| wSGMM 6-state (dCore)                              | 3.89(1)               |                        | 378.6(1)                       |
| uSGMM 6-state                                      | 2.9(1)                |                        | 368.0(1)                       |
| uSGMM 6-state (dCore)                              | 3.93(1)               |                        | 367.66(9)                      |
| wSGMM 12-state                                     | 3.7(1)                | 7.2(6)                 | 388.4(1)                       |
| wSGMM 12-state (dCore)*                            | 3.91(1)               | 9.39(5)                | 383.16(9)                      |
| Stock 12-state (dCore)                             | 3.91(1)               | 9.30(4)                | 364.2(3)                       |
| Stock 12-state (state specific dCore) <sup>†</sup> | 3.93(1)               | 9.46(3)                | 363.9(2)                       |

\* Dynamic coring of wSGMM 12-state yielded a 10-state model.

## References

- (1) Scherer, M. K.; Trendelkamp-Schroer, B.; Paul, F.; Pérez-Hernández, G.; Hoffmann, M.; Plattner, N.; Wehmeyer, C.; Prinz, J.-H.; Noé, F. PyEMMA 2: A software package for estimation, validation, and analysis of Markov models. *J. Chem. Theor. Comput.* **2015**, *11*, 5525–5542.
- (2) Nagel, D.; Weber, A.; Lickert, B.; Stock, G. Dynamical coring of Markov state models. *J. Chem. Phys.* **2019**, *150*.
- (3) Sittel, F.; Stock, G. Robust Density-Based Clustering to Identify Metastable Conformational States of Proteins. *J. Chem. Theory Comput.* **2016**, *12*, 2426–2435.
